# Supplementary material
Source: PubMed Central journal article supplement (PMC3955973)
Supplement: Supp_Fig1.pdf [file Supp_Fig1.pdf]

## Supplementary Data

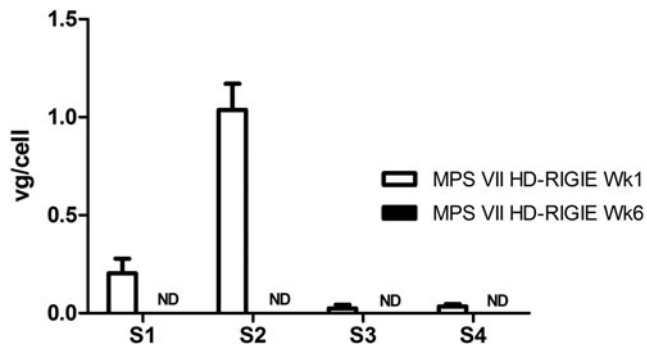

**SUPPLEMENTARY FIG. S1.** Quantification of viral genomes per cell (vg/cell) by quantitative polymerase chain reaction in brain slices from the contralateral hemisphere from animals injected 1 and 6 weeks earlier with HD-RIGIE. HD-RIGIE, helper-dependent CAV-2 vector expressing  $\beta$ -glucuronidase; MPS VII, mucopolysaccharidosis type VII; ND, not detected; Wk, week.
