# Supplementary material
Source: PubMed Central journal article supplement (PMC3955973)
Supplement: Supp_Fig2.pdf [file Supp_Fig2.pdf]

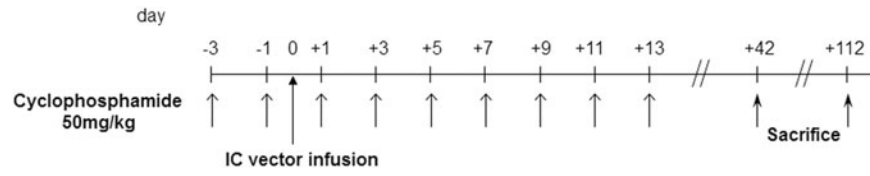

**SUPPLEMENTARY FIG. S2.** Experimental design used in the transient immunosuppression using cyclophosphamide, LC, intracranial.
