# Supplementary material
Source: PubMed Central journal article supplement (PMC3955973)
Supplement: Supp_Fig3.pdf [file Supp_Fig3.pdf]

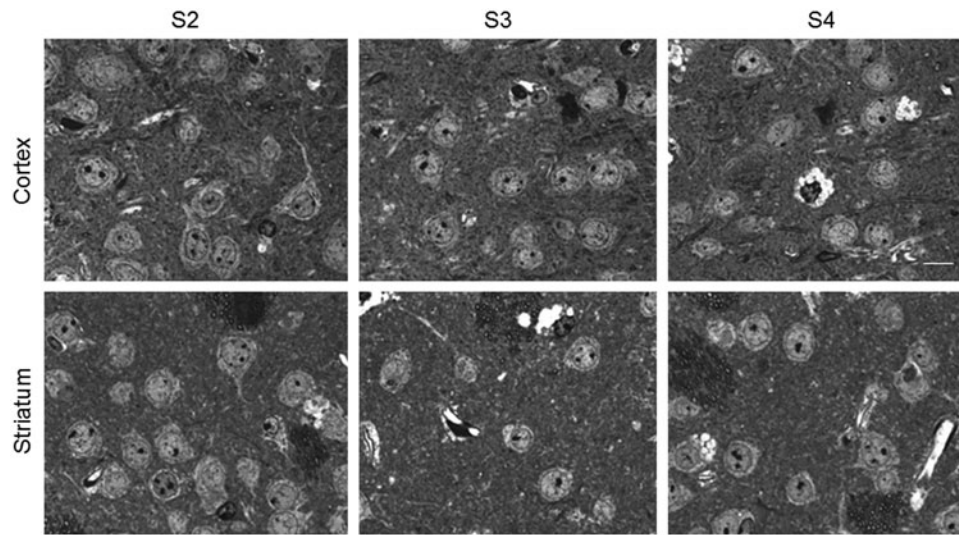

**SUPPLEMENTARY FIG. S3.** Histopathological studies 6 weeks postinjection in the contralateral hemisphere. Representative images from cortex and striatum in S2 and at more distal areas, in S3 (middle) and S4 level (right), in MPS VII HD-RIGIE. Scale bar = 20  $\mu$ m.
